# Supplementary material for: Polymer-assisted chemical solution approach to YVO4:Eu nanoparticle networks
Source: Royal Society of Chemistry journal article supplement (doi:10.1039/c2jm15628h), 2012-01-01
Supplement: c2jm15628h.pdf [file c2jm15628h.pdf]

# Supporting Information for

## Polymer-assisted chemical solution approach to $\text{YVO}_4:\text{Eu}$ nanoparticle networks

Qianglu Lin,<sup>a</sup> **Yun Xu,<sup>a</sup> Engang Fu,<sup>b</sup>** Stacy Baber,<sup>a</sup> Zongbi Bao,<sup>a</sup> Liang Yu,<sup>a</sup> Shuguang Deng,<sup>a</sup> Janardan Kundu,<sup>b</sup> Jennifer Hollingsworth,<sup>b</sup> Eve Bauer,<sup>b</sup> T. Mark McCleskey,<sup>b</sup> Anthony K. Burrell,<sup>b</sup> Quanxi Jia<sup>\*,b</sup> and Hongmei Luo<sup>\*,a</sup>

<sup>a</sup>Department of Chemical Engineering, New Mexico State University, New Mexico 88003

<sup>b</sup>Center for Integrated Nanotechnologies, Materials Physics and Applications Division, Los Alamos National Laboratory, Los Alamos, New Mexico 87545

\* Address correspondence to qxjia@lanl.gov, hluo@nmsu.edu

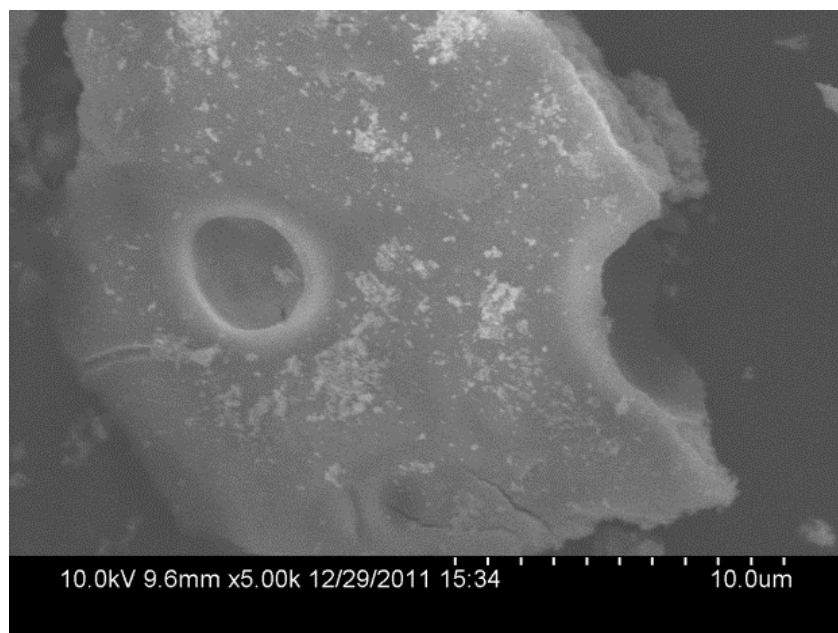

Figure S1. SEM image of  $\text{YVO}_4:\text{Eu}$  annealed at 700 °C from precursor without EDTA.

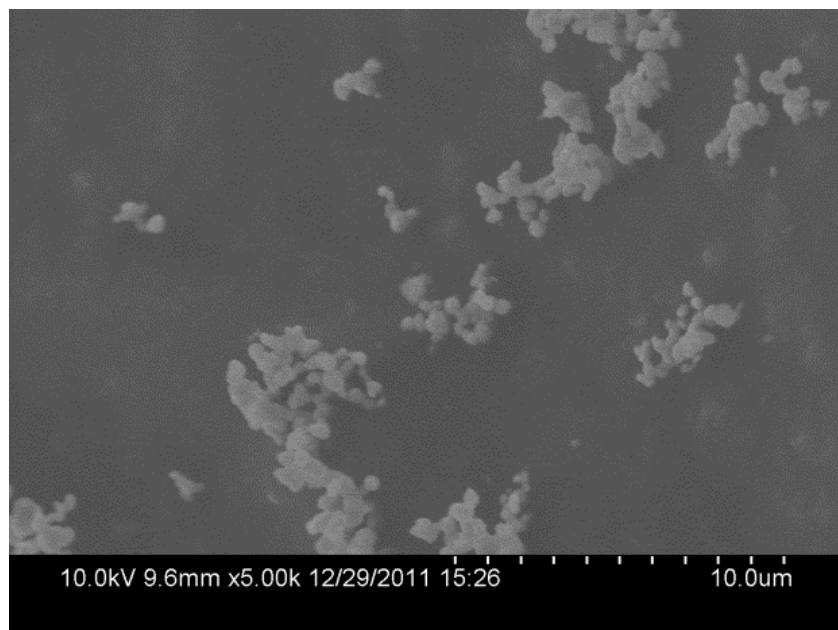

Figure S2. SEM image of YVO<sub>4</sub>:Eu annealed at 700 °C from precursor without PEI.

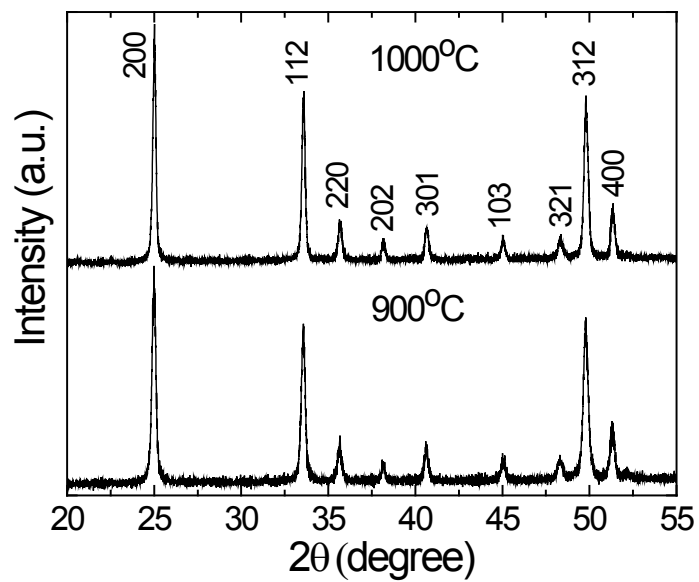

Figure S3. XRD patterns of YVO<sub>4</sub>:Eu annealed at 900 and 1000 °C.

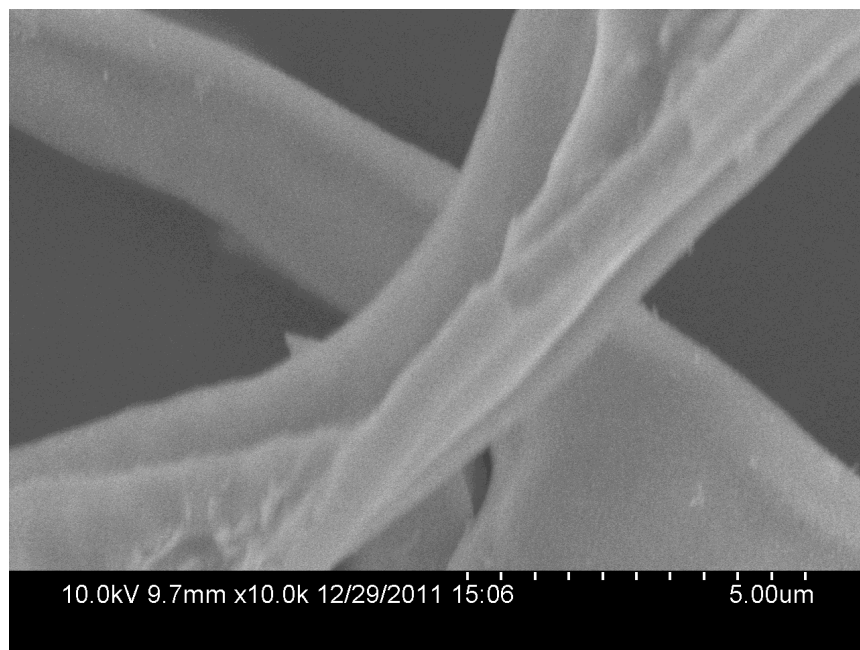

Figure S4. SEM image of YVO<sub>4</sub>:Eu annealed at 900 °C.

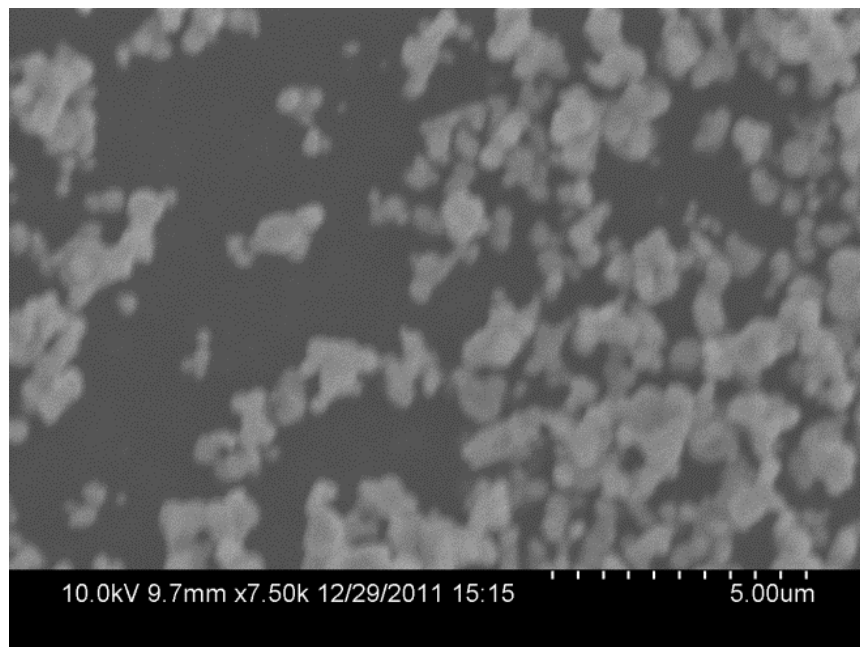

Figure S5. SEM image of YVO<sub>4</sub>:Eu annealed at 1000 °C.
